# Supplementary material for: Evaluating electrochemical accessibility of 4fn5d1 and 4fn+1 Ln(ii) ions in (C5H4SiMe3)3Ln and (C5Me4H)3Ln complexes
Source: Royal Society of Chemistry journal article supplement (doi:10.1039/d1dt02427b), 2021-01-01
Supplement: d1dt02427b1.pdf [file d1dt02427b1.pdf]

Supporting Information for:

**Evaluating Electrochemical Accessibility of  $4f^n5d^1$  and  $4f^{n+1}$  Ln(II) Ions  
in  $(C_5H_4SiMe_3)_3Ln$  and  $(C_5Me_4H)_3Ln$  Complexes**

Michael T. Trinh, Justin C. Wedal, and William J. Evans\*

Department of Chemistry, University of California, Irvine, California 92697-2025, United States

Email: [wevans@uci.edu](mailto:wevans@uci.edu)

\*To whom correspondence should be addressed.

## Table of Contents

|                                                                                                       |     |
|-------------------------------------------------------------------------------------------------------|-----|
| <b>Cyclic Voltammetry for:</b>                                                                        |     |
| Cp <sub>3</sub> Y                                                                                     | S3  |
| Cp <sub>3</sub> La                                                                                    | S3  |
| Cp <sub>3</sub> Ce                                                                                    | S4  |
| Cp <sub>3</sub> Pr                                                                                    | S4  |
| [K(crypt)][Cp <sub>3</sub> Pr]                                                                        | S5  |
| Cp <sub>3</sub> Nd                                                                                    | S5  |
| Cp <sub>3</sub> Sm                                                                                    | S6  |
| [K(crypt)][Cp <sub>3</sub> Sm]                                                                        | S6  |
| Cp <sub>3</sub> Eu                                                                                    | S7  |
| [K(crypt)][Cp <sub>3</sub> Eu]                                                                        | S7  |
| Cp <sub>3</sub> Gd                                                                                    | S8  |
| Cp <sub>3</sub> Tb                                                                                    | S8  |
| Cp <sub>3</sub> Dy                                                                                    | S9  |
| Cp <sub>3</sub> Ho                                                                                    | S9  |
| Cp <sub>3</sub> Er                                                                                    | S10 |
| Cp <sub>3</sub> Tm                                                                                    | S10 |
| Cp <sub>3</sub> Yb                                                                                    | S11 |
| Cp <sub>3</sub> Lu                                                                                    | S11 |
| Cp <sup>tet</sup> <sub>3</sub> La                                                                     | S12 |
| Cp <sup>tet</sup> <sub>3</sub> Ce                                                                     | S12 |
| Cp <sup>tet</sup> <sub>3</sub> Pr                                                                     | S13 |
| Cp <sup>tet</sup> <sub>3</sub> Nd                                                                     | S13 |
| Cp <sup>tet</sup> <sub>3</sub> Sm                                                                     | S14 |
| Cp <sup>tet</sup> <sub>3</sub> Gd                                                                     | S14 |
| Cp <sup>tet</sup> <sub>3</sub> Tb                                                                     | S15 |
| Cp <sup>tet</sup> <sub>3</sub> Dy                                                                     | S15 |
| Cp <sup>tet</sup> <sub>3</sub> Ho                                                                     | S16 |
| <b>Table S1:</b> Experimental and theoretical calculated reduction potentials for the lanthanide ions | S16 |
| <b>References</b>                                                                                     | S17 |

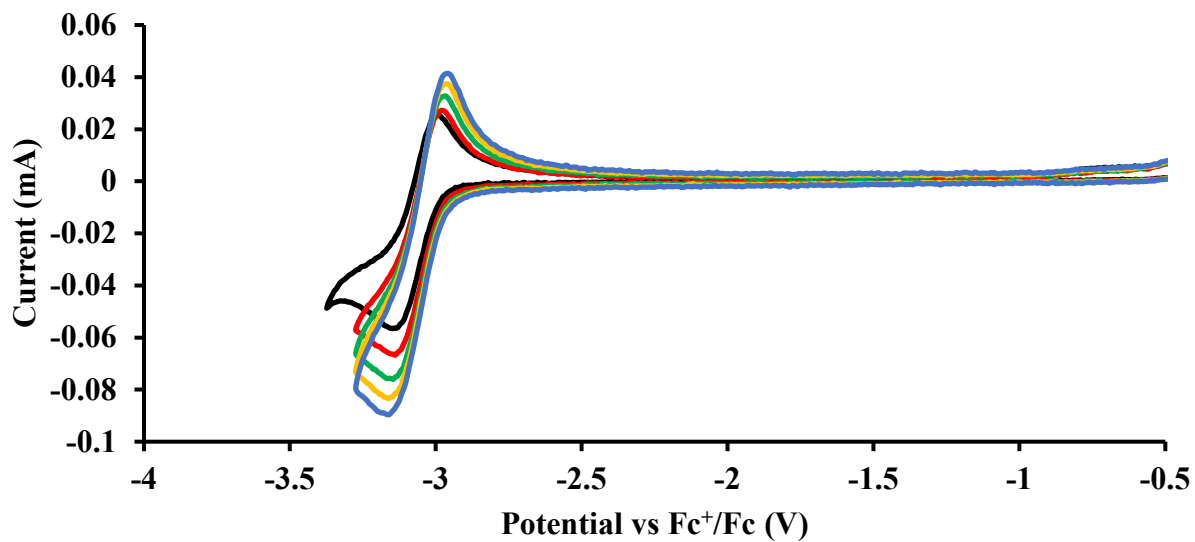

Figure S1: Cyclic voltammogram of Cp'3Y at  $\nu = 200$  (black), 400 (red), 600 (green), 800 (yellow) and 1000 (blue) mV/s.

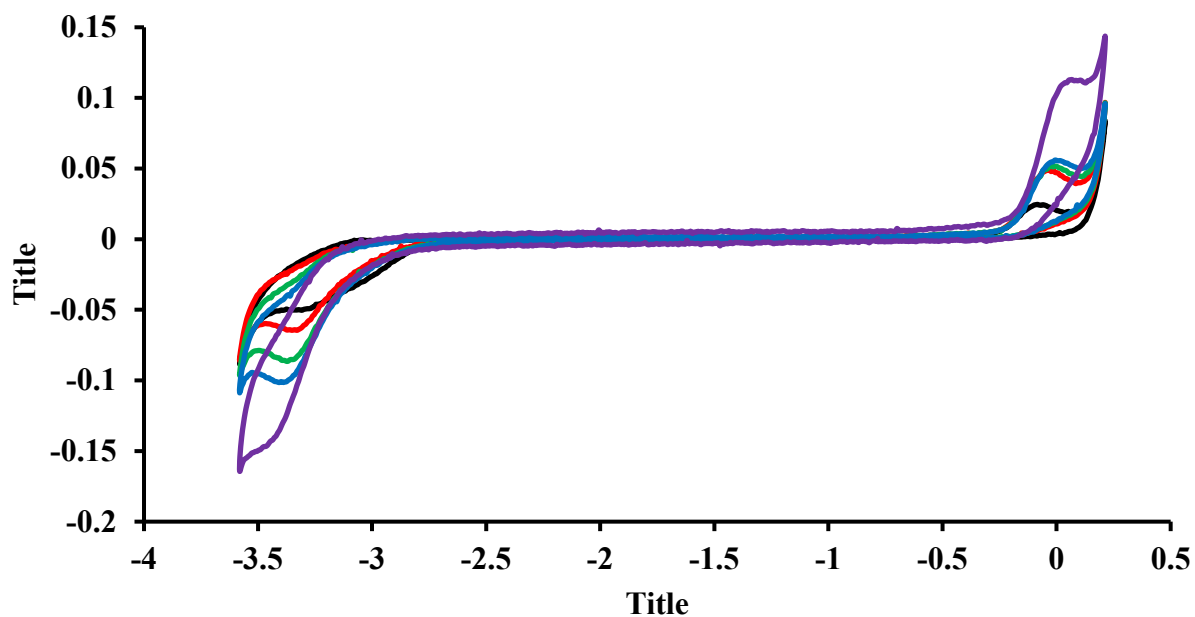

Figure S2: Cyclic voltammogram of Cp'3La at  $\nu = 200$  (black), 400 (red), 600 (green), 1000 (blue) and 2000 (purple) mV/s.

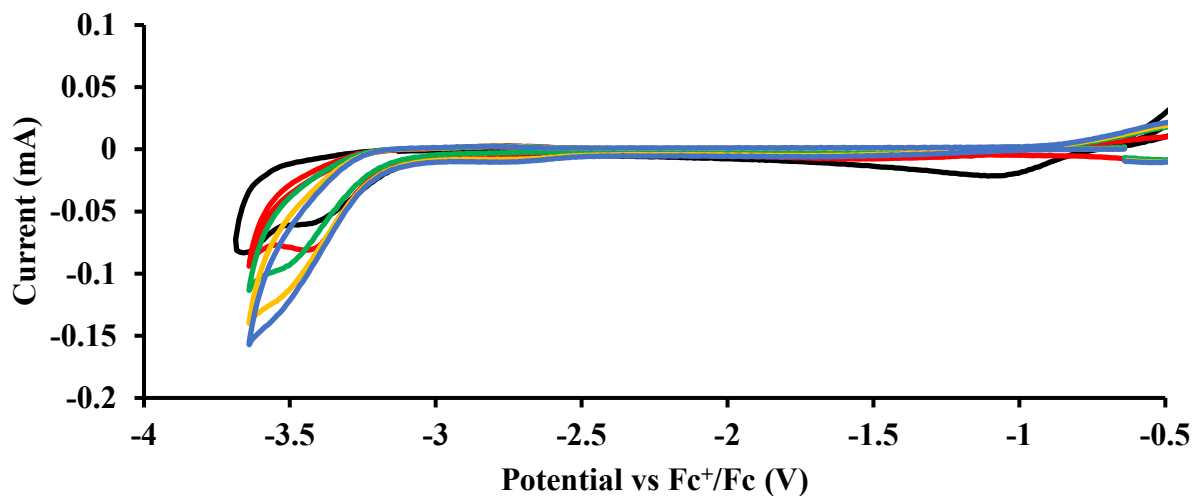

Figure S3: Cyclic voltammogram of  $\text{Cp}^*_3\text{Ce}$  at  $\nu = 200$  (black), 400 (red), 600 (green), 800 (yellow) and 1000 (blue)  $\text{mV/s}$ .

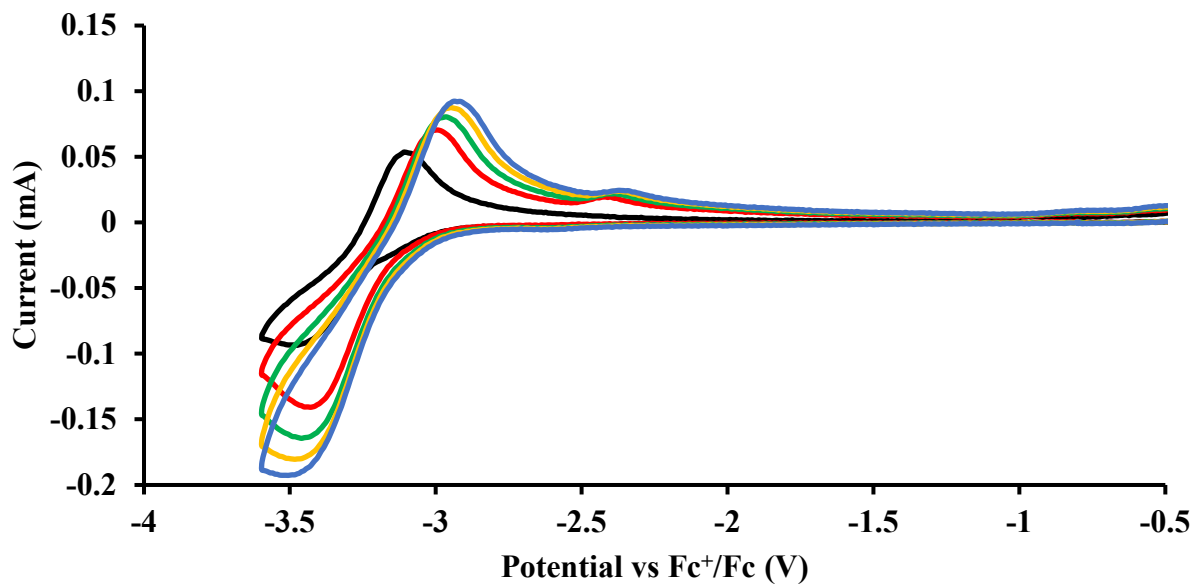

Figure S4: Cyclic voltammogram of  $\text{Cp}^*_3\text{Pr}$  at  $\nu = 200$  (black), 400 (red), 600 (green), 800 (yellow) and 1000 (blue)  $\text{mV/s}$ .

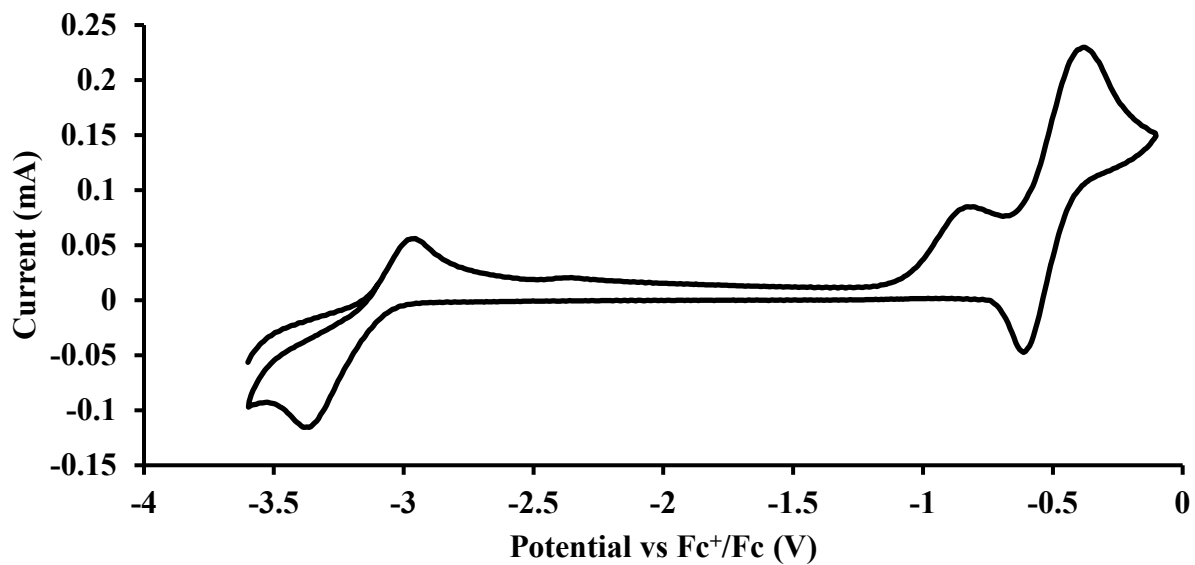

Figure S5: Cyclic voltammogram of  $[\text{K}(\text{crypt})][\text{Cp}'_3\text{Pr}]$  at  $\nu = 200$  mV/s with internal standard  $(\text{C}_5\text{Me}_5)_2\text{Fe}$ .

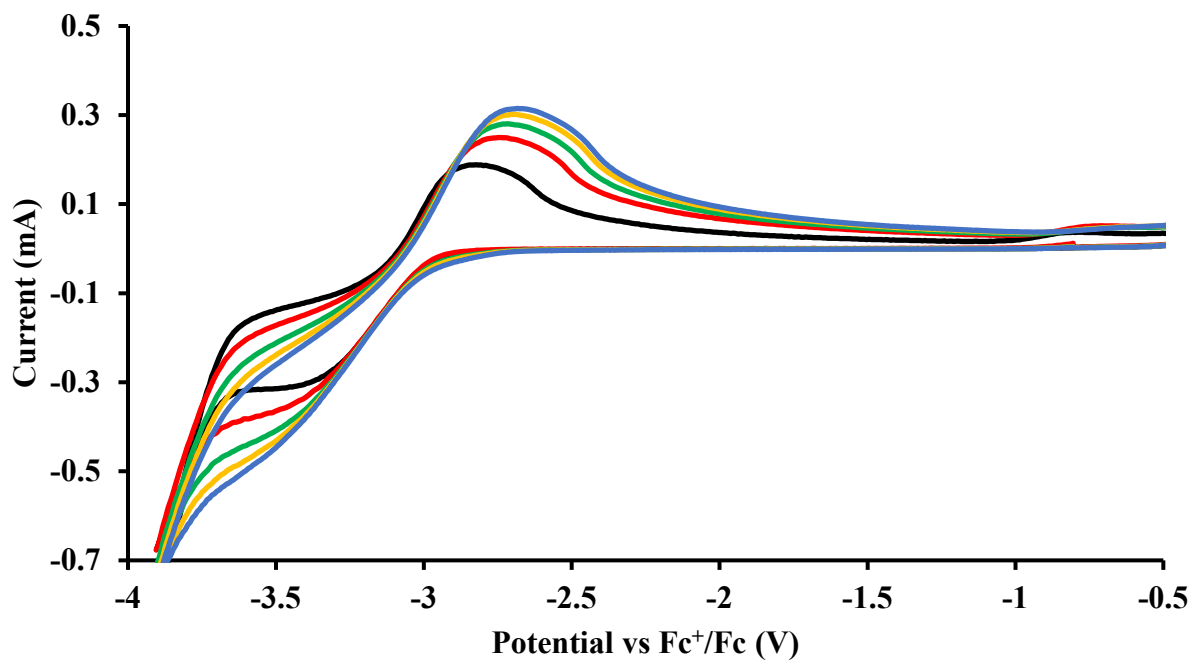

Figure S6: Cyclic voltammogram of  $\text{Cp}'_3\text{Nd}$  at  $\nu = 200$  (black), 400 (red), 600 (green), 800 (yellow) and 1000 (blue) mV/s.

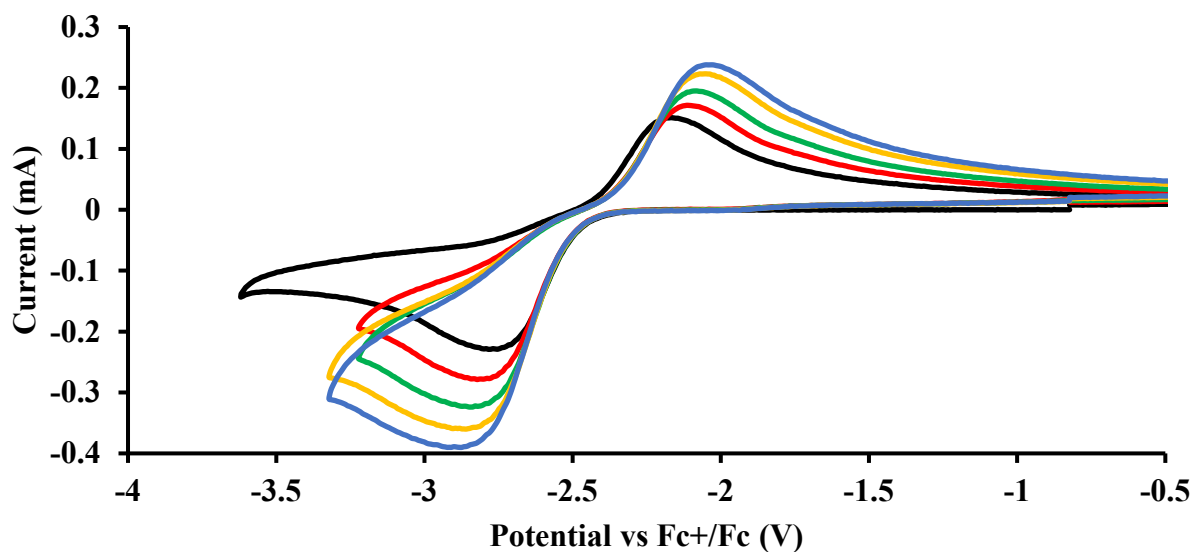

Figure S7: Cyclic voltammogram of  $\text{Cp}'_3\text{Sm}$  at  $\nu = 200$  (black), 400 (red), 600 (green), 800 (yellow) and 1000 (blue)  $\text{mV/s}$ .

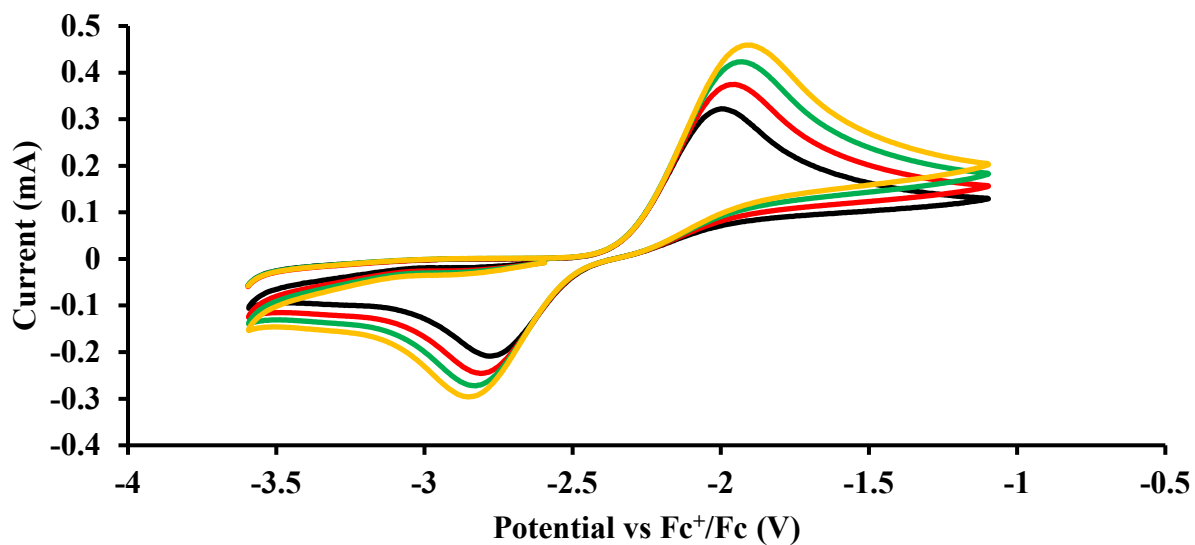

Figure S8: Cyclic voltammogram of  $[\text{K}(\text{crypt})][\text{Cp}'_3\text{Sm}]$  at  $\nu = 200$  (black), 400 (red), 600 (green) and 800 (yellow)  $\text{mV/s}$ .

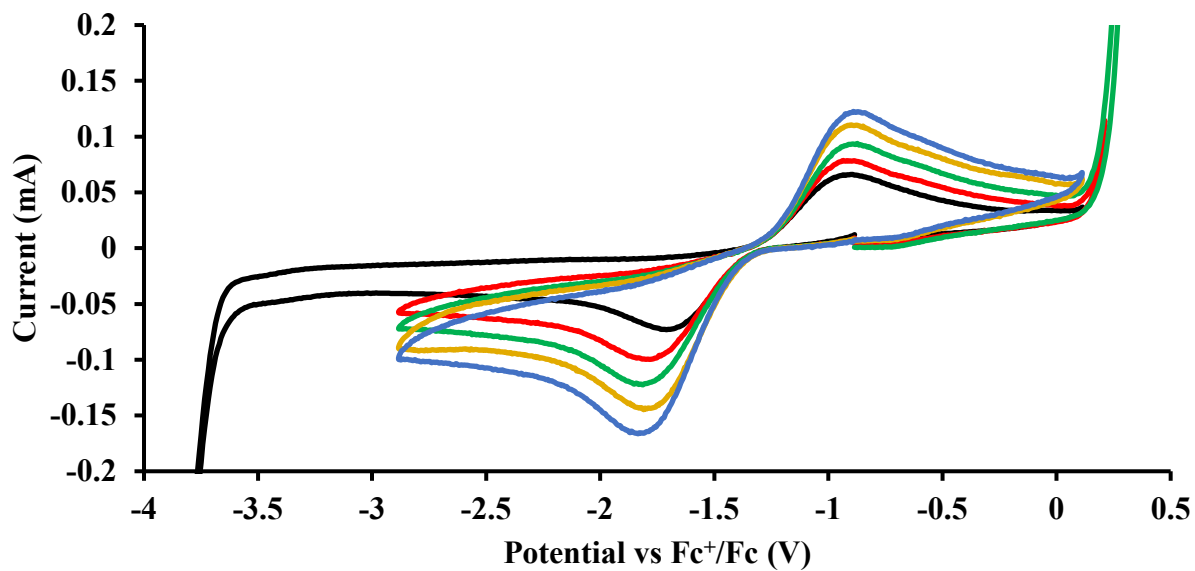

Figure 9S: Cyclic voltammogram of Cp'3Eu at  $\nu = 200$  (black), 400 (red), 600 (green), 800 (yellow) and 1000 (blue) mV/s.

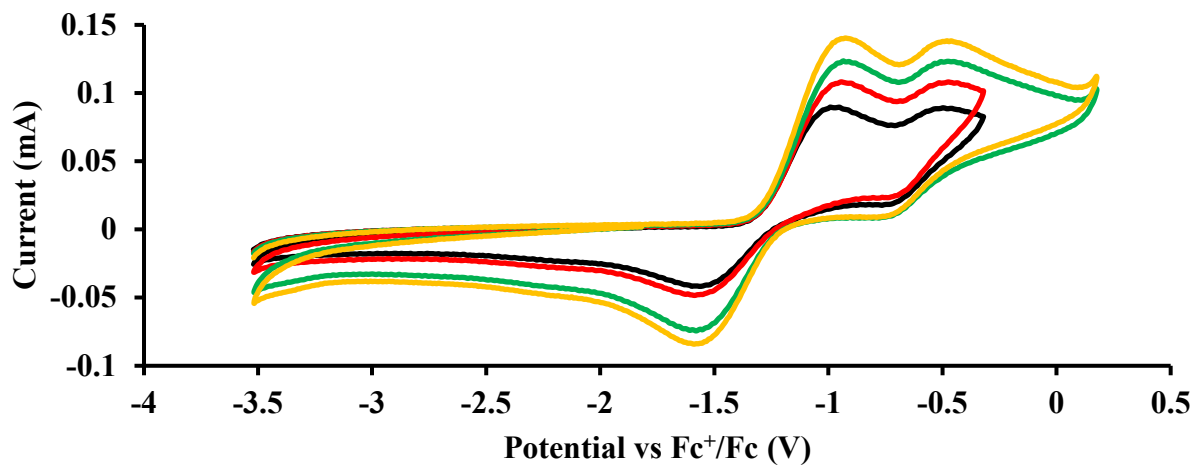

Figure S10: Cyclic voltammogram of [K(crypt)][Cp'3Eu] at  $\nu = 200$  (black), 400 (red), 600 (green), and 800 (yellow) mV/s.

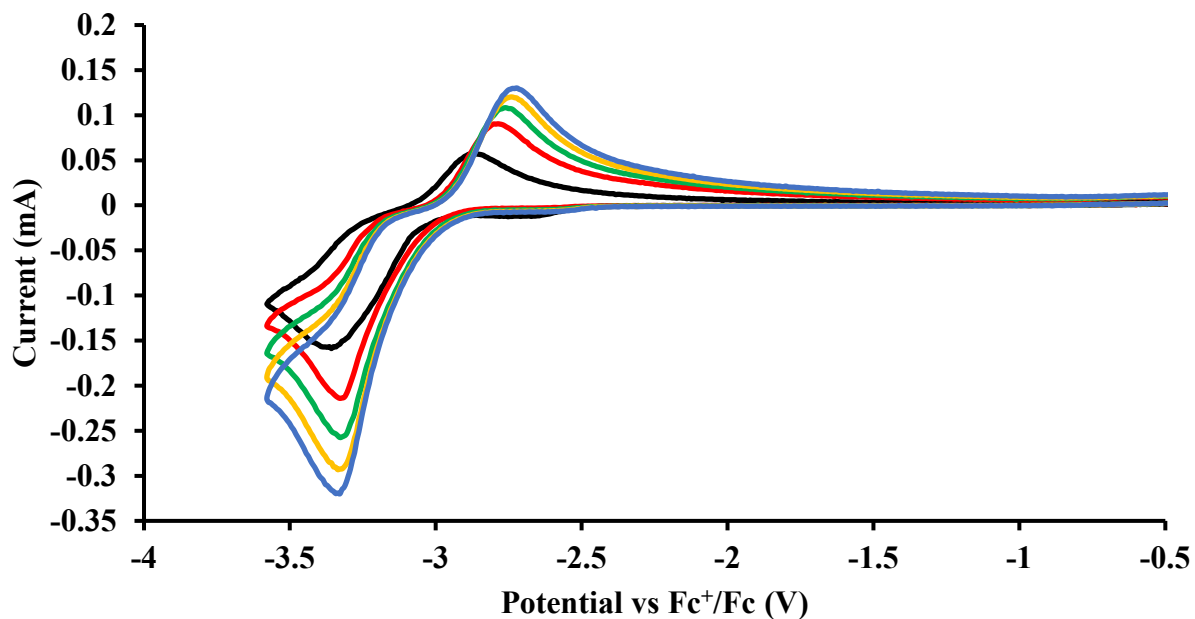

Figure S11: Cyclic voltammogram of Cp'3Gd at  $\nu = 200$  (black), 400 (red), 600 (green), 800 (yellow) and 1000 (blue) mV/s.

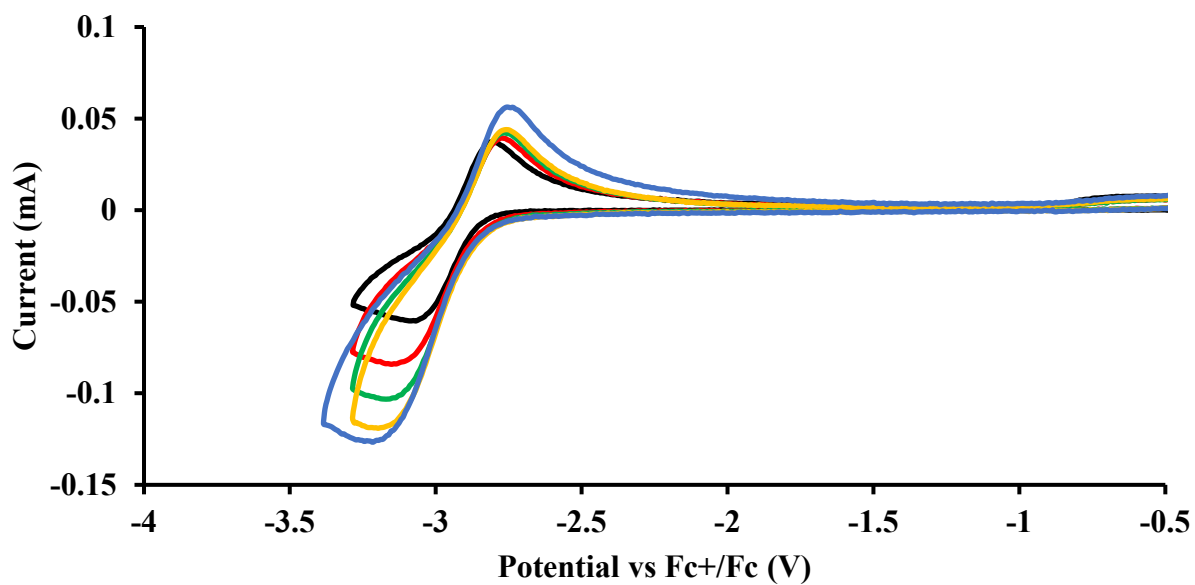

Figure S12: Cyclic voltammogram of Cp'3Tb at  $\nu = 200$  (black), 400 (red), 600 (green), 800 (yellow) and 1000 (blue) mV/s.



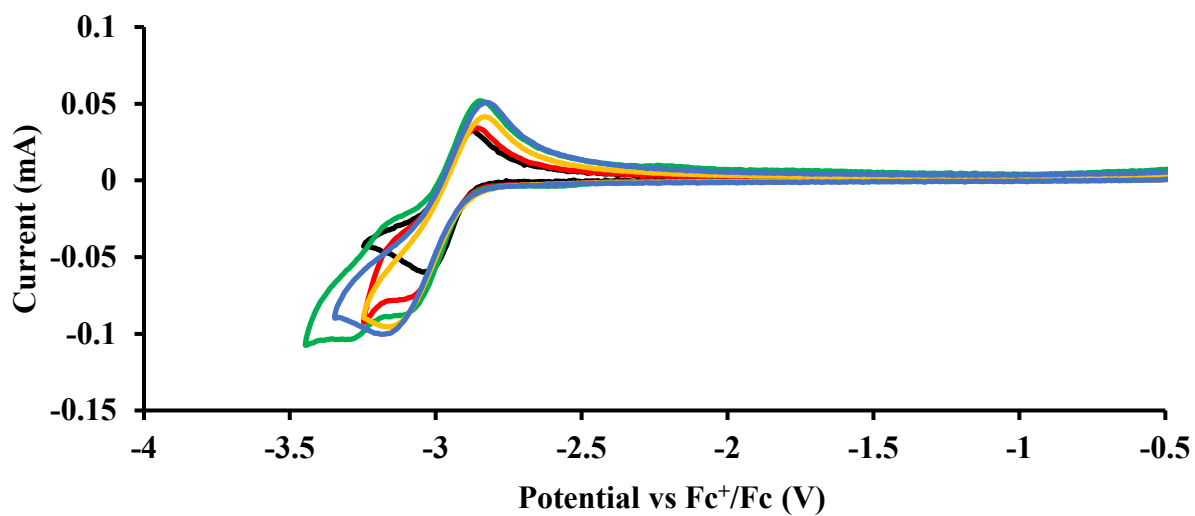

Figure S13: Cyclic voltammogram of Cp'<sub>3</sub>Dy at  $\nu = 200$  (black), 400 (red), 600 (green), 800 (yellow) and 1000 (blue) mV/s.

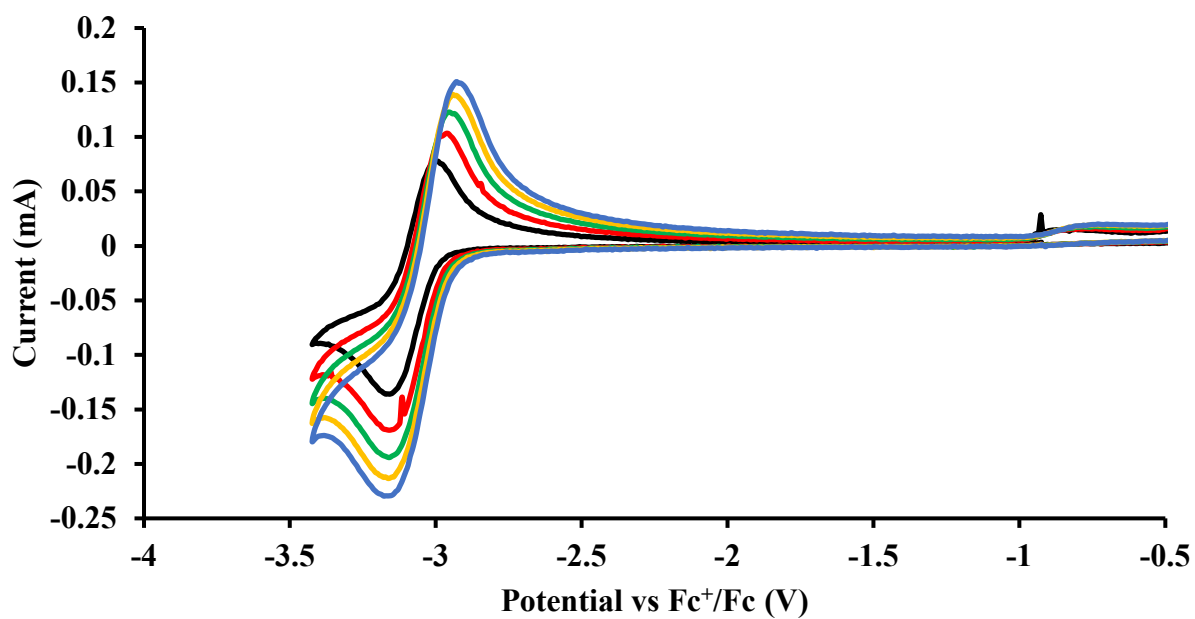

Figure S14: Cyclic voltammogram of Cp'<sub>3</sub>Ho at  $\nu = 200$  (black), 400 (red), 600 (green), 800 (yellow) and 1000 (blue) mV/s.

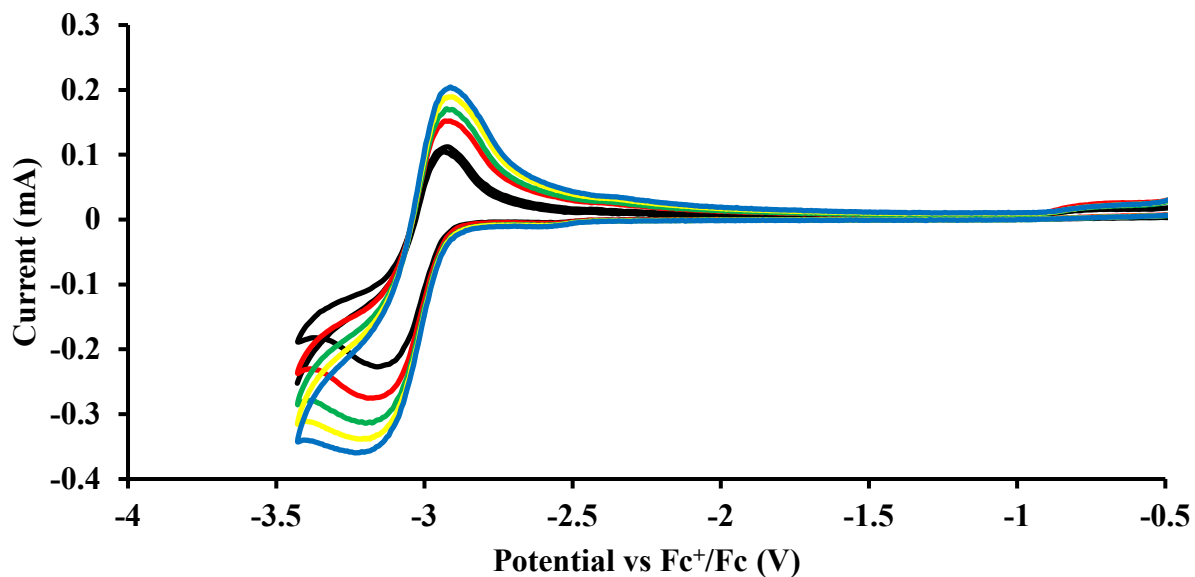

Figure S15: Cyclic voltammogram of Cp'<sub>3</sub>Er at  $\nu = 200$  (black), 400 (red), 600 (green), 800 (yellow) and 1000 (blue) mV/s.

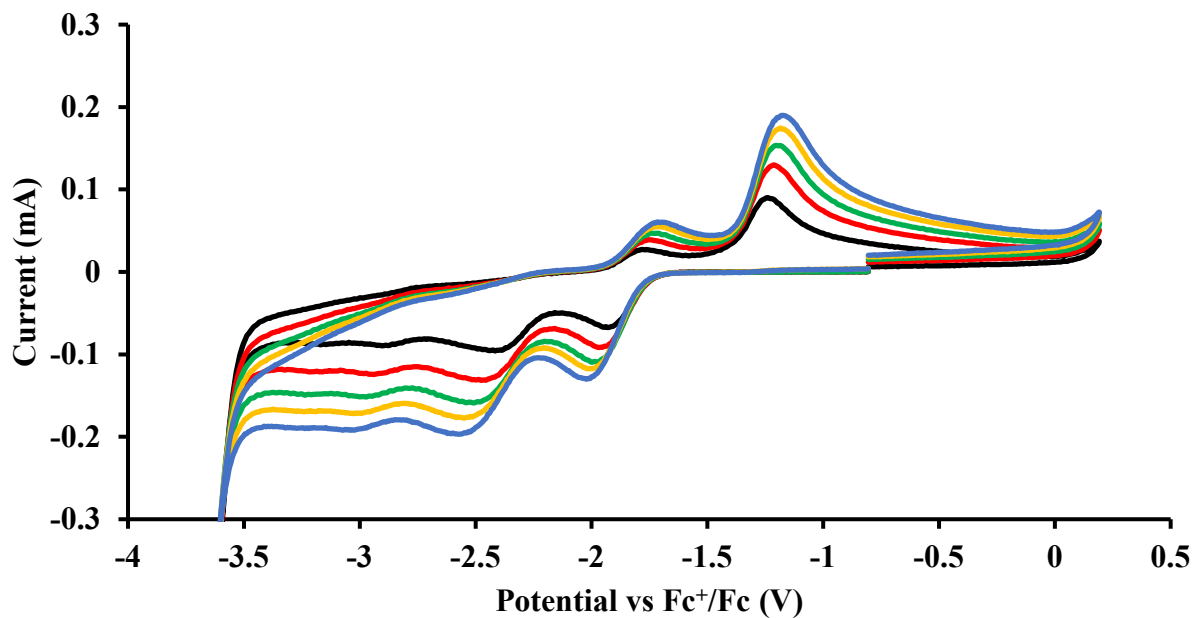

Figure S16: Cyclic voltammogram of Cp'<sub>3</sub>Yb at  $\nu = 200$  (black), 400 (red), 600 (green), 800 (yellow) and 1000 (blue) mV/s. The cathodic event at  $-2.5$  V and anodic event at  $-1.7$  V are likely due to electrolyte degradation or decomposition of Cp'<sub>3</sub>Yb.

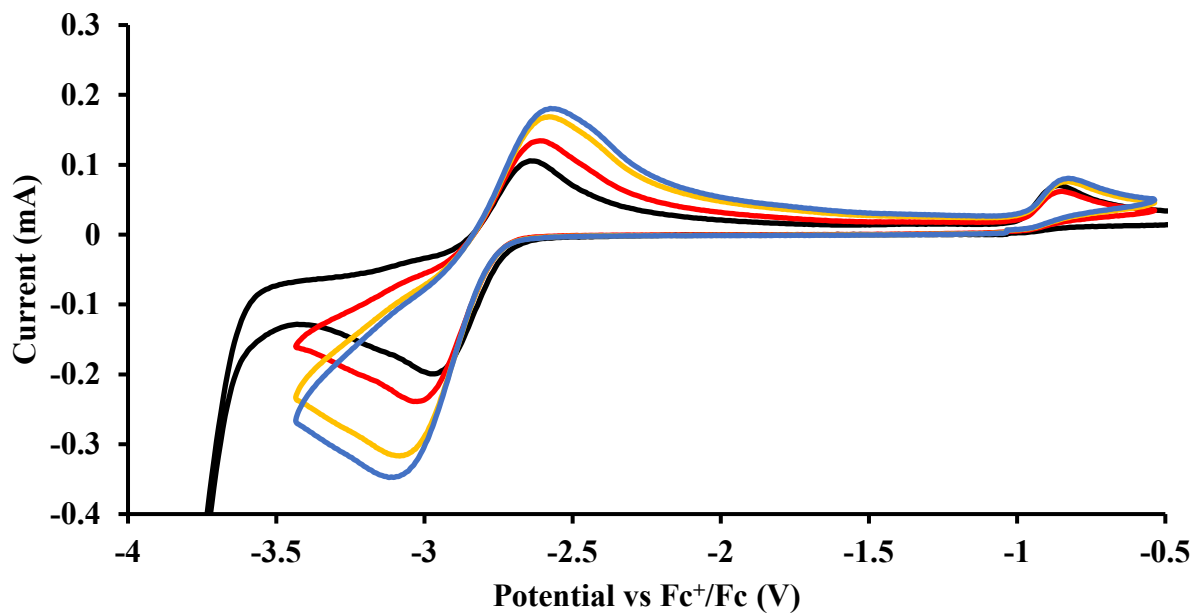

Figure S17: Cyclic voltammogram of Cp'3Tm at  $\nu = 200$  (black), 400 (red), 800 (yellow) and 1000 (blue) mV/s.

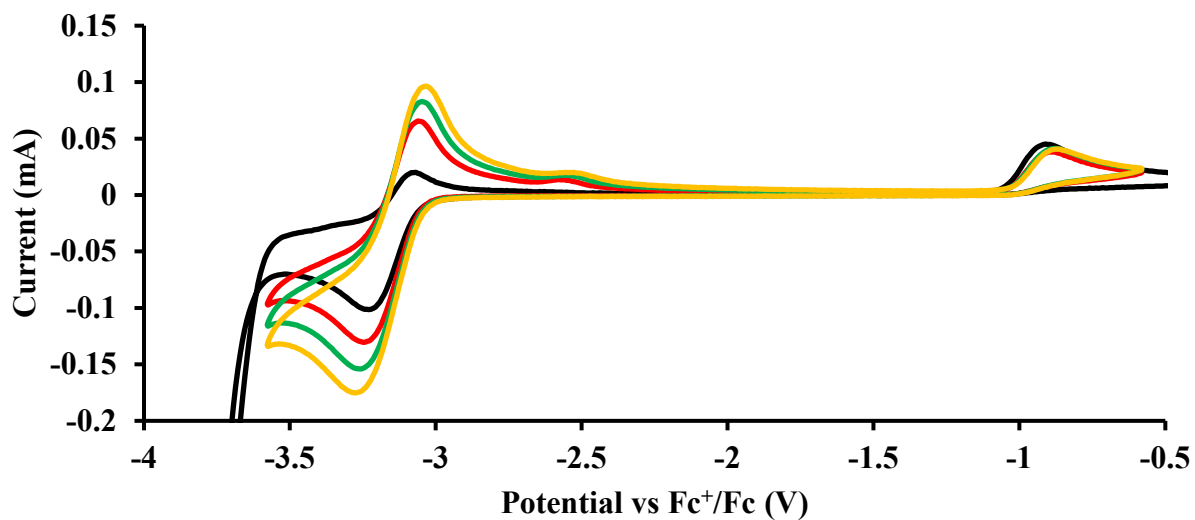

Figure S18: Cyclic voltammogram of Cp'3Lu at  $\nu = 200$  (black), 400 (red), 600 (green), and 800 (yellow) mV/s.

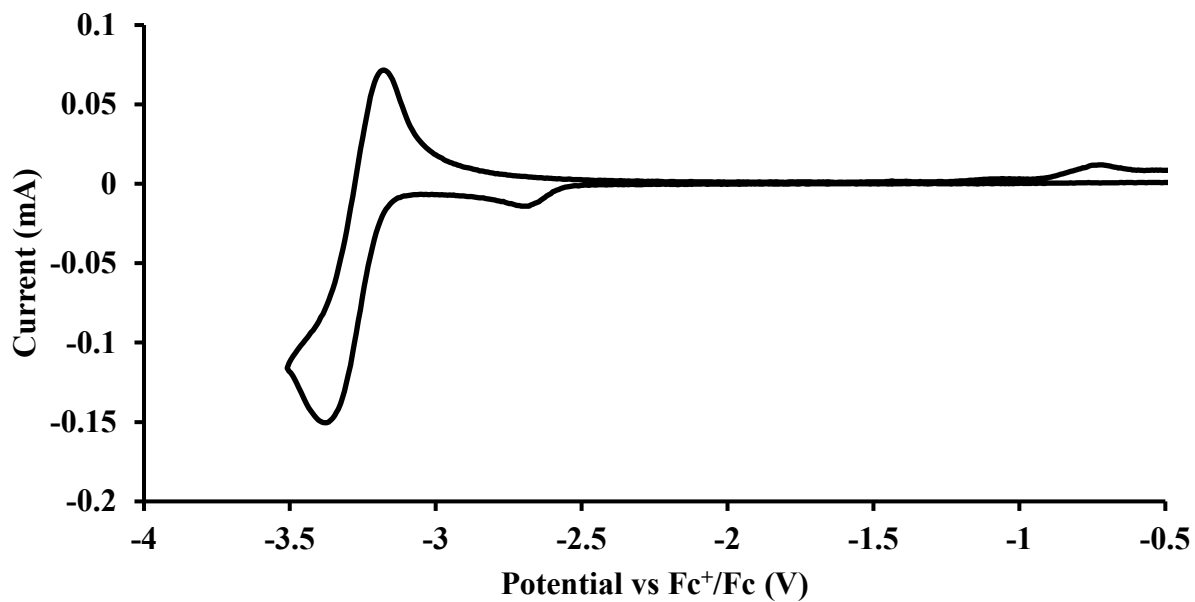

Figure S19: Cyclic voltammogram of Cp<sup>tet</sup><sub>3</sub>La at  $v = 200$  mV/s.

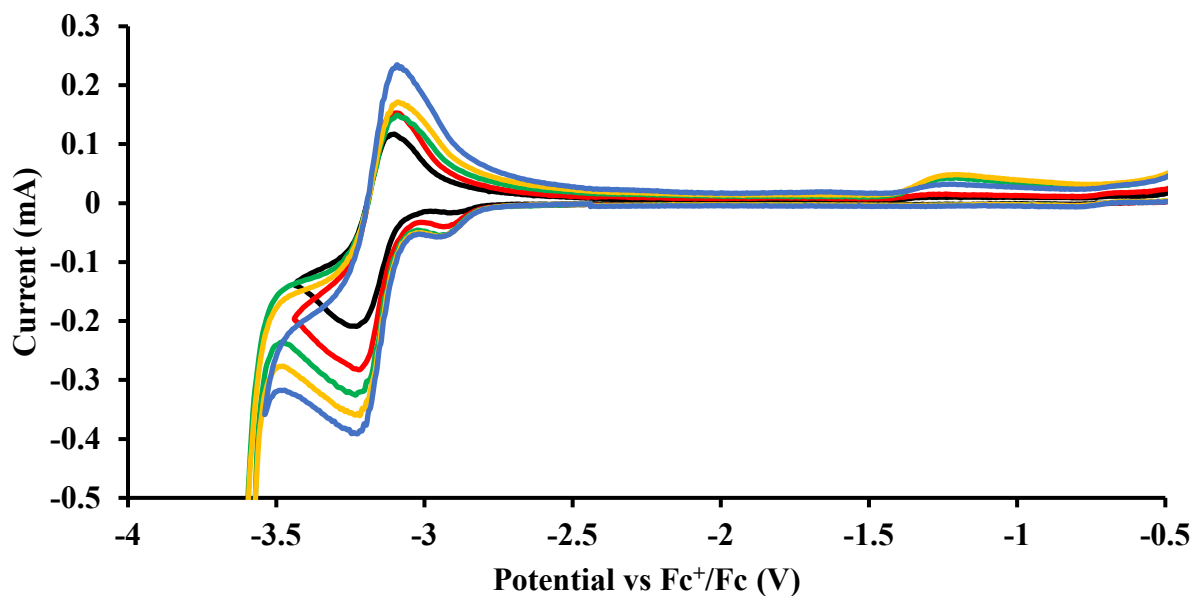

Figure S20: Cyclic voltammogram of Cp<sup>tet</sup><sub>3</sub>Ce at  $v = 200$  (black), 400 (red), 600 (green), 800 (yellow), and 1000 (blue) mV/s.

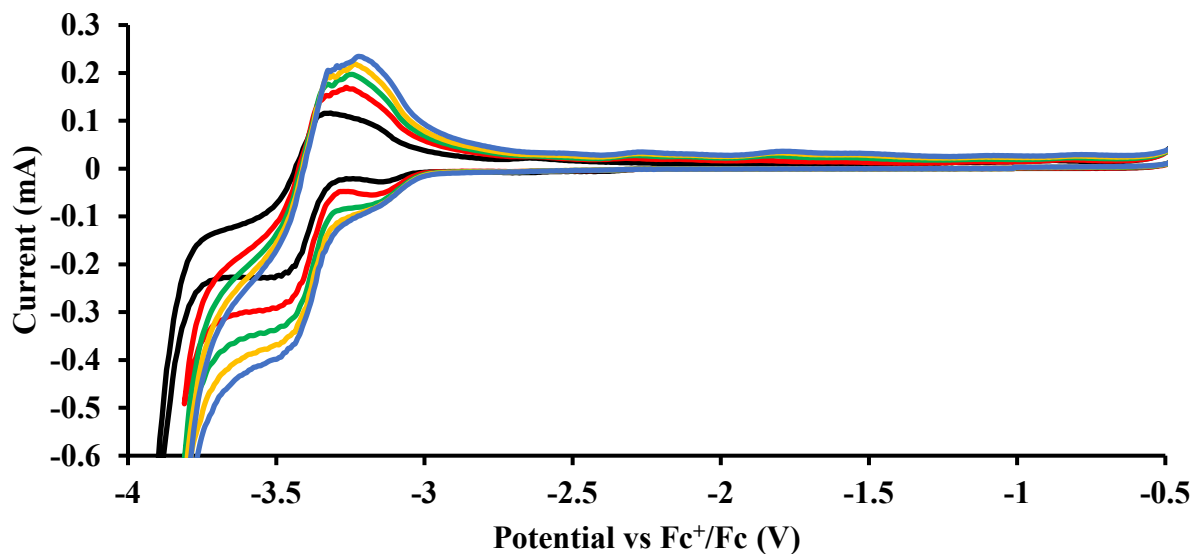

Figure S21: Cyclic voltammogram of Cp<sup>tet</sup><sub>3</sub>Pr at  $\nu = 200$  (black), 400 (red), 600 (green), 800 (yellow) and 1000 (blue) mV/s.

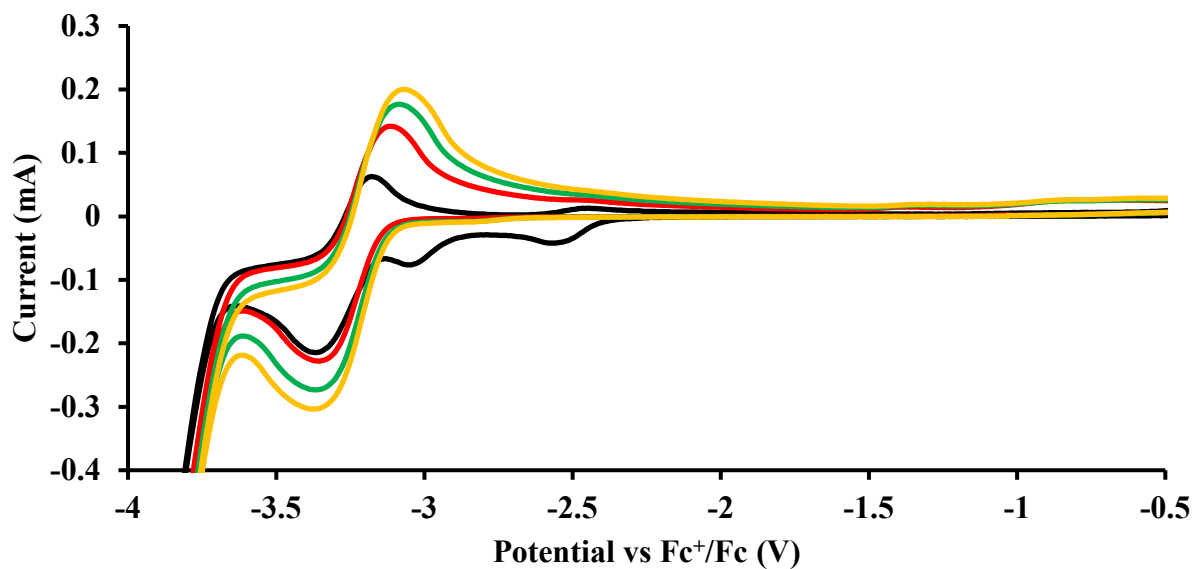

Figure S22: Cyclic voltammogram of Cp<sup>tet</sup><sub>3</sub>Nd at  $\nu = 200$  (black), 400 (red), 600 (green), and 800 (yellow) mV/s.

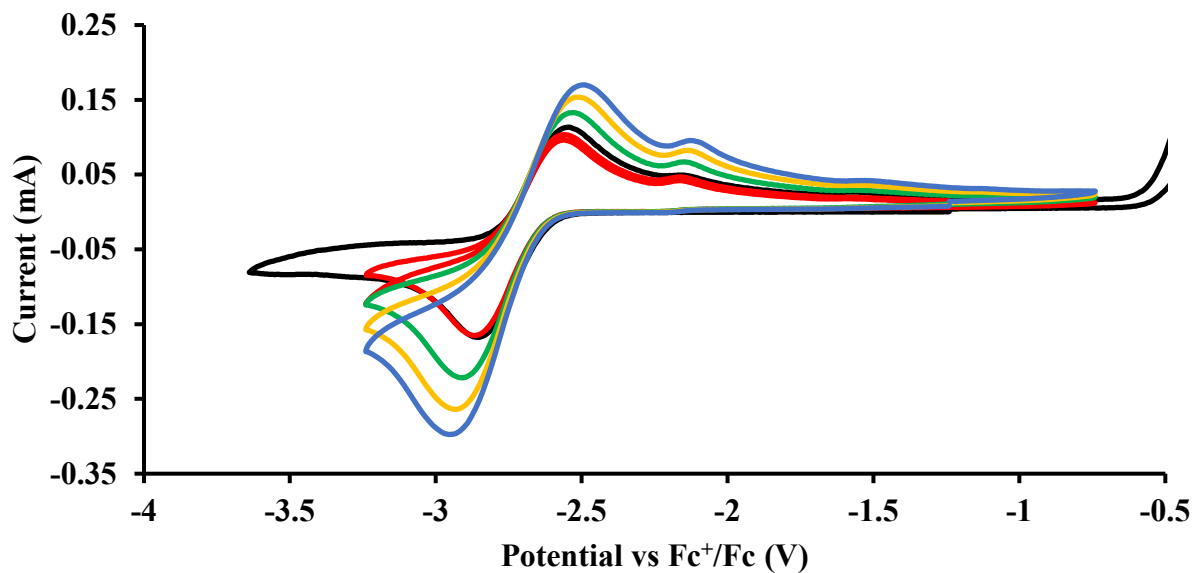

Figure S23: Cyclic voltammogram of  $\text{Cp}^{\text{tet}}_3\text{Sm}$  at  $\nu = 200$  (black), 400 (red), 600 (green), 800 (yellow) and 1000 (blue) mV/s.

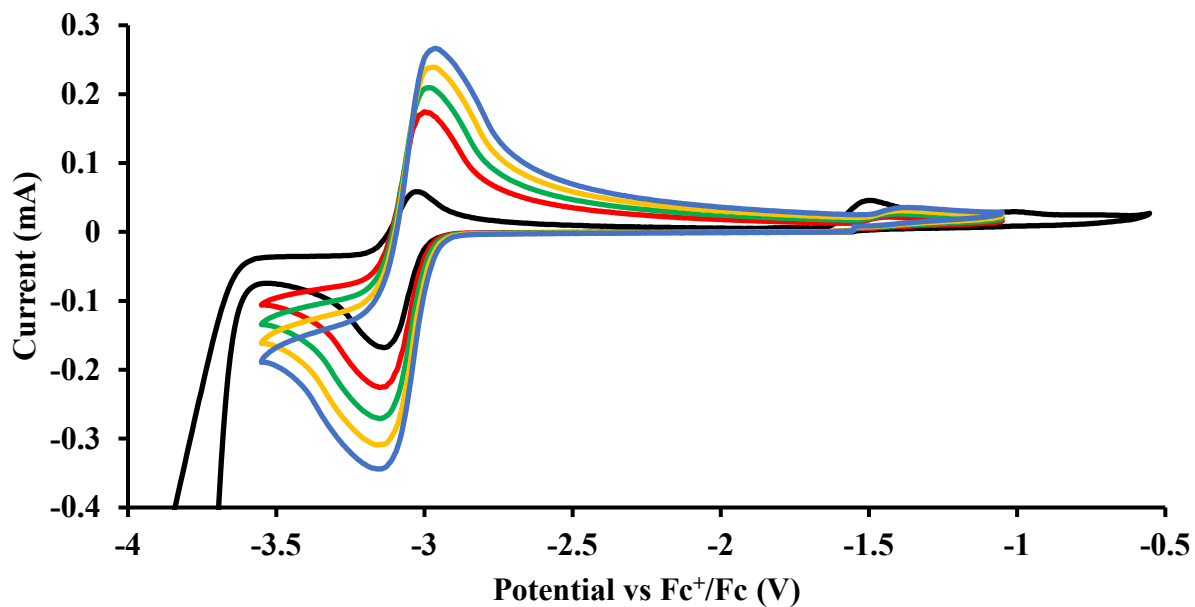

Figure S24: Cyclic voltammogram of  $\text{Cp}^{\text{tet}}_3\text{Gd}$  at  $\nu = 200$  (black), 400 (red), 600 (green), 800 (yellow) and 1000 (blue) mV/s.

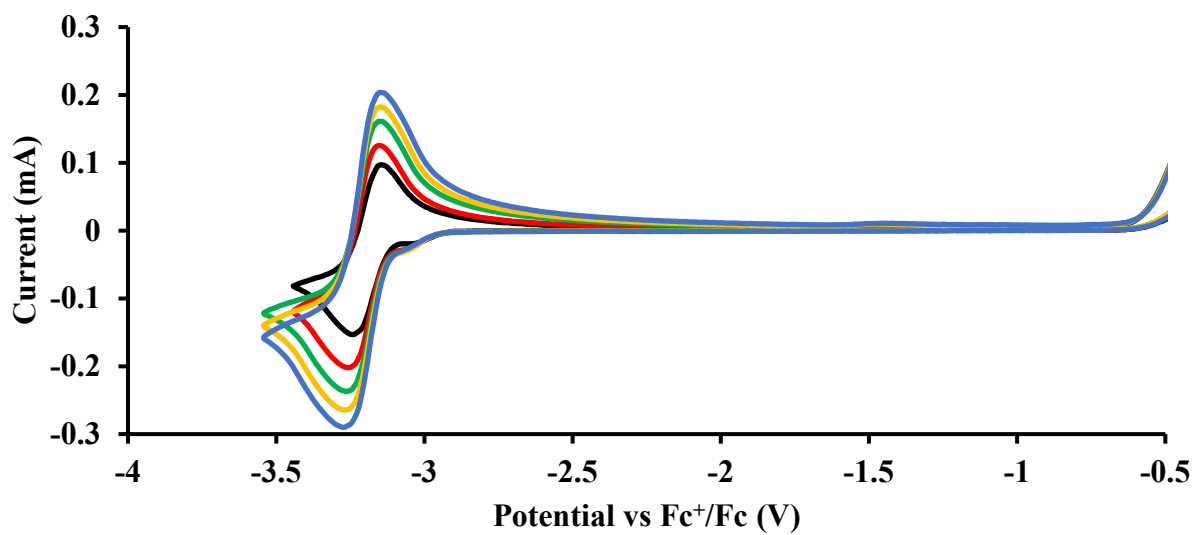

Figure S25: Cyclic voltammogram of Cp<sup>tet</sup><sub>3</sub>Tb at  $\nu = 200$  (black), 400 (red), 600 (green), 800 (yellow) and 1000 (blue) mV/s.

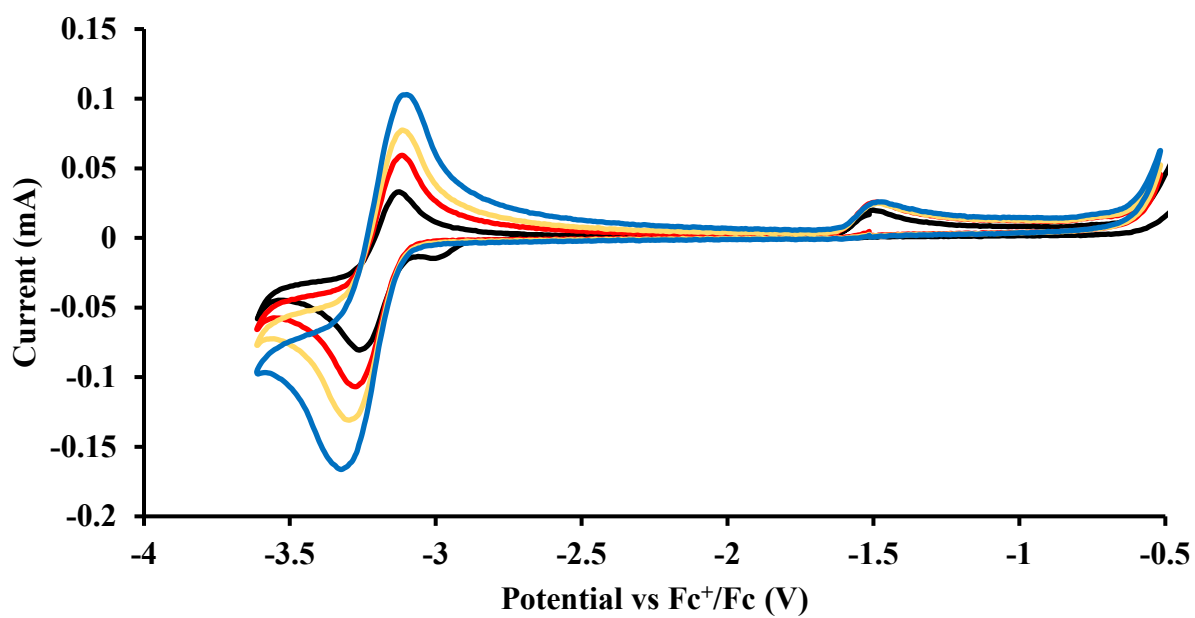

Figure S26: Cyclic voltammogram of Cp<sup>tet</sup><sub>3</sub>Dy at  $\nu = 200$  (black), 400 (red), 800 (yellow) and 1000 (blue) mV/s.

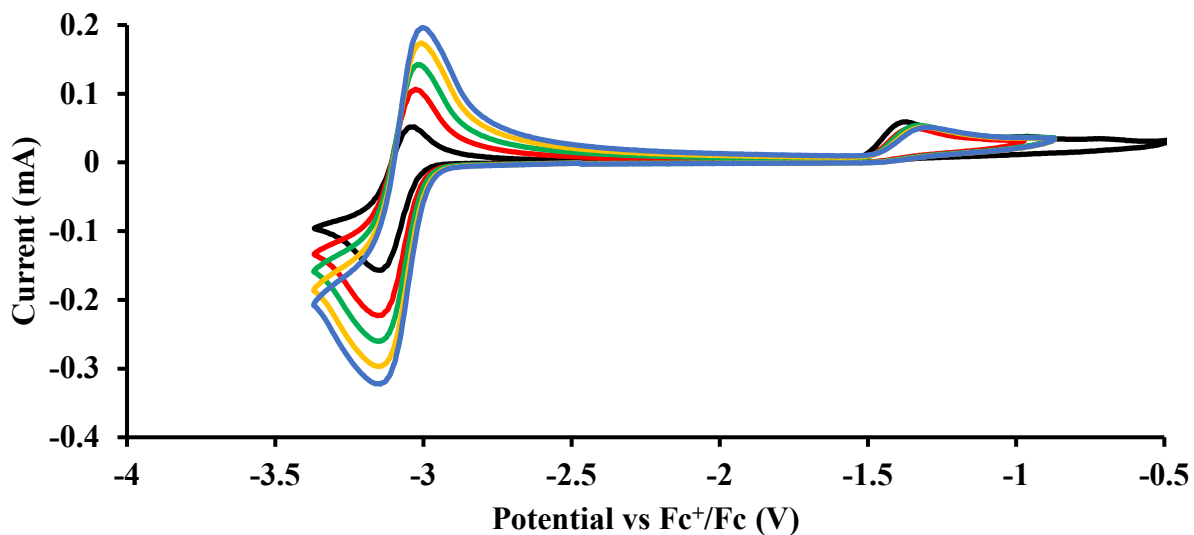

Figure S27: Cyclic voltammogram of  $\text{Cp}^{\text{tet}}_3\text{Ho}$  at  $\nu = 200$  (black), 400 (red), 600 (green), 800 (yellow) and 1000 (blue) mV/s.

**Table S1:** Experimental and theoretical calculated Ln(III)/Ln(II) reduction potentials for the lanthanide ions. Values are reported vs  $\text{Fc}^+/\text{Fc}$  (reported as  $-0.40$  V vs NHE).<sup>1</sup>

|    | Experimental<br>$E_{1/2}$ in $\text{Cp}'_3\text{Ln}$ | Thermochemical<br>estimates <sup>2,a</sup> | Thermodynamic<br>estimates <sup>3,a</sup> | Atomic<br>spectroscopy<br>estimates <sup>4</sup> |
|----|------------------------------------------------------|--------------------------------------------|-------------------------------------------|--------------------------------------------------|
| La | N/A                                                  | -3.34                                      | -3.4 <sup>b</sup>                         | -2.7                                             |
| Ce | N/A                                                  | -3.36                                      | -3.3 <sup>b</sup>                         | -2.8                                             |
| Pr | -3.14                                                | -2.63                                      | -2.7                                      | -2.3                                             |
| Nd | -3.14                                                | -2.22                                      | -2.4                                      | -2.2                                             |
| Sm | -2.41                                                | -1.17                                      | -1.2                                      | -1.2                                             |
| Eu | -1.07                                                | 0.15                                       | 0.1                                       | 0.1                                              |
| Gd | -2.98                                                | -3.42                                      | -3.1 <sup>b</sup>                         | -3.5                                             |
| Tb | -2.95                                                | -3.07                                      | -3.1 <sup>b</sup>                         | -3.3                                             |
| Dy | -2.96                                                | -2.02                                      | -2.3                                      | -2.2                                             |
| Ho | -3.02                                                | -2.40                                      | -2.5                                      | -2.5                                             |
| Er | -3.02                                                | -2.56                                      | -2.7                                      | -2.7                                             |
| Tm | -2.83                                                | -1.87                                      | -1.9                                      | -1.9                                             |
| Yb | -1.64                                                | -0.64                                      | -0.7                                      | -0.7                                             |
| Lu | -3.12                                                |                                            | -4.2 <sup>b</sup>                         |                                                  |

a: Values are for aqueous ions

b:  $\text{Ln}^{2+}(\text{aq})$  is predicted to be  $4f^n5d^1$



## References

1. N. G. Connelly and W. E. Geiger, *Chem. Rev.*, 1996, **96**, 877–910.
2. L. R. Morss, *Chem. Rev.*, 1976, **76**, 827–841.
3. S. G. Bratsch and J. J. Lagowski, *J. Phys. Chem.*, 1985, **89**, 3317–3319.
4. L. J. Nugent, R. D. Baybarz, J. L. Burnett and J. L. Ryan, *J. Phys. Chem.*, 1973, **77**, 1528–1539.
